# Supplementary material
Source: PubMed Central journal article supplement (PMC7963774)
Supplement: 15-00764.pdf [file 15-00764.pdf]

### Higher RD and Worse Memory Performance

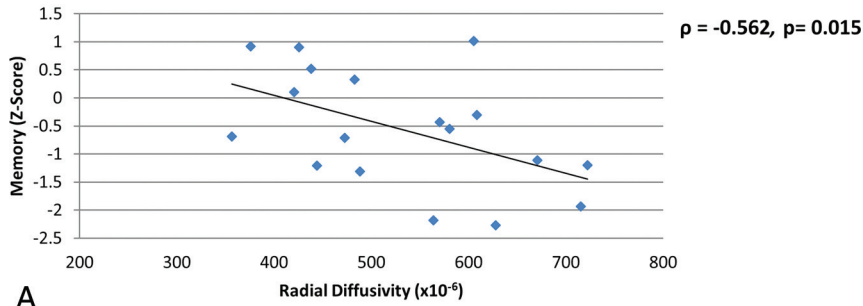

A

### Higher MD and Worse Memory Performance

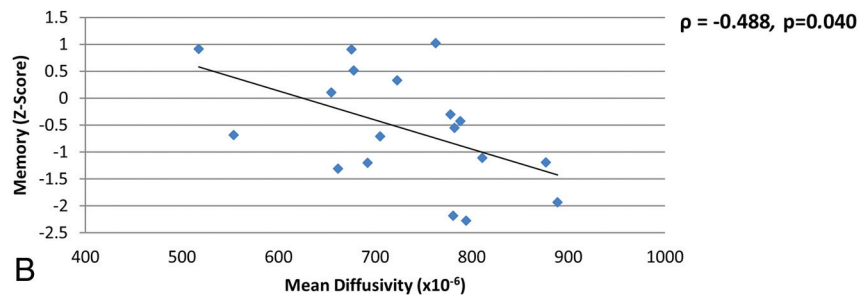

B

**ON-LINE FIG 3.** Associations between brain-wide imaging measures and long-term cognitive outcomes. Higher RD (A) and MD (B) within areas showing *hFA* correlate with worse performance on tasks of memory at 1 year ( $\rho = -0.562, P = .015$  and  $\rho = -0.488, P = .040$ , respectively).

### Higher MD and Worse Somatic Autonomy

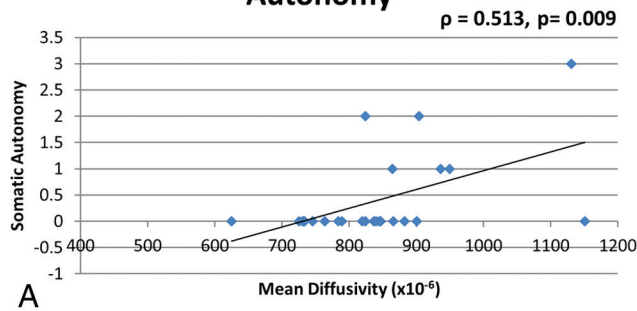

A

### Higher RD and Worse Somatic Autonomy

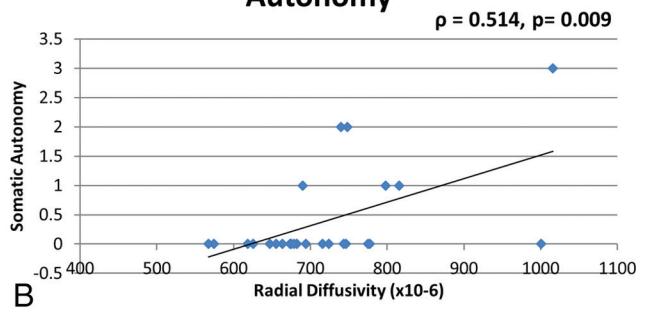

B

### Lower FA and Worse Psychological Autonomy and Communication

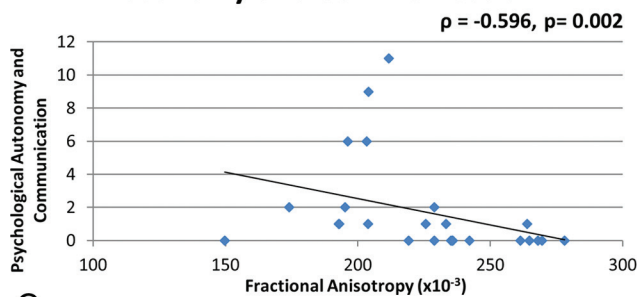

C

### Lower FA and Worse Emotional Stability

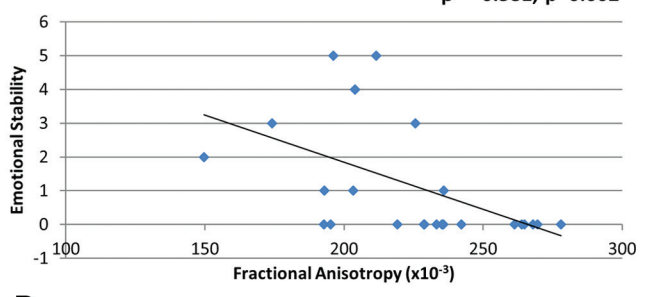

D

**ON-LINE FIG 4.** Associations between brain-wide imaging measures and long-term functional outcomes. Higher MD (A) and RD (B) within areas showing *hFA* correlate with greater impairment in somatic autonomy at 1 year ( $\rho = 0.513, P = .009$ ;  $\rho = 0.514, P = .009$ , respectively). Lower FA within areas showing *hFA* correlates with greater impairment in psychological autonomy and communication ( $\rho = -0.596, P = .002$ ) (C) and emotional stability ( $\rho = -0.581, P = .002$ ) (D).
